# Supplementary material for: Flow-based pipeline for systematic modulation and analysis of 3D tumor microenvironments
Source: PubMed Central journal article supplement — Lab Chip. 2013 Apr 5;13(10):1969–78. doi: 10.1039/c3lc41300d (PMC3812960; doi:10.1039/c3lc41300d), 2013-04-05
Supplement: LC-013-c3lc41300d-s001.pdf [file LC-013-c3lc41300d-s001.pdf]

## Supplementary Information

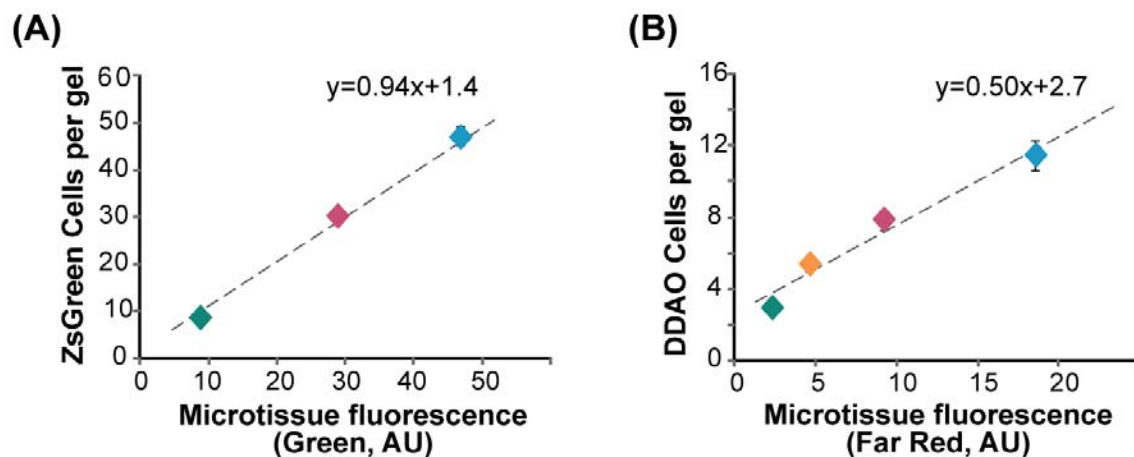

**Supplemental Figure 1.** Correlation of number of (A) ZsGreen expressing 393T5 cells or (B) CellTracker FarRed DDAO-stained J2-3T3 fibroblasts encapsulated per microtissue as quantified by nuclear staining and microscopy, with microtissue fluorescence in the corresponding channel as detected by flow analysis.

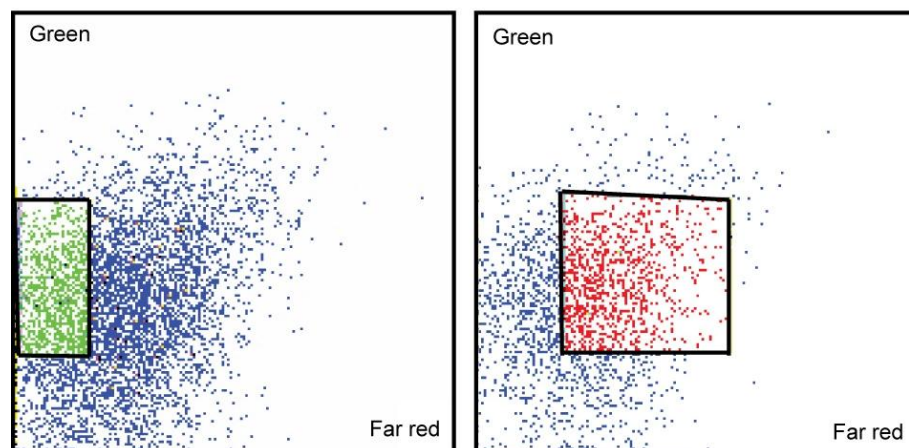

**Supplemental Figure 2.** Flow analysis and sorting of microtissues containing co-encapsulated tumor (393T5) and stromal (J2-3T3) cells, with individual microtissues (blue events) displaying variations in number of each cell type (y-axis = Green 393T5 cell density, x-axis = FarRed J2-3T3 cell density). Low stromal ratio and high stromal ratio populations were defined by gating in both channels, maintaining the same y-axis range in both gates, but shifting the x-axis gate to the left (green events) for lower stromal density, and to the right (red events) for higher stromal density.

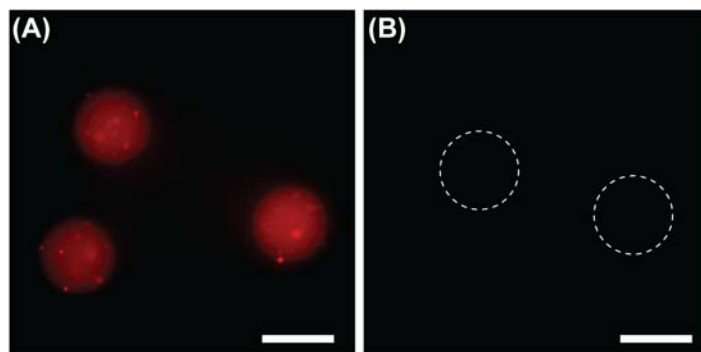

**Supplemental Figure 3.** Epifluorescence microscopy of cell-free microtissues formed from either (A) prepolymer containing 20 μg/ml of Texas Red labeled antibody (rabbit, polyclonal IgG), or (B) control blank PEG prepolymer. Microtissues were washed in PBS for 24 hours post-polymerization. Scale bar = 100 μm.
